# Supplementary material
Source: publisher site journal article supplement (https://www.dovepress.com/article/254369)
Supplement: Supplementary file 1 [file get_supplementary_file.php]

**Cognitive functions and the role of socio-demographic factors**

| **Cognitive domain** | | **Test** | **Gender** | | **F** | ***p*** | **Age** | | **F** | ***p*** | **Education** | | **F** | ***p*** |
| --- | --- | --- | --- | --- | --- | --- | --- | --- | --- | --- | --- | --- | --- | --- |
|  |  | | **Male** | **Female** |  |  | **≤ 50** | **≥ 51** |  |  | **≤ 8** | **≥ 9** |  |  |
|  |  | | **M (SD)** | **M (SD)** |  |  | **M (SD)** | **M (SD)** |  |  | **M (SD)** | **M (SD)** |  |  |
| **Attention** | TMT Aa | | 43.07 (20.62) | 35.76 (12.31) | 1.696 | 0.20 | 34.11 (10.55) | 44.68 (21.02) | 3.789 | **0.05** | 42.62 (22.28) | 38.70 (15.37) | 0.438 | 0.51 |
| **Memory** | Digit span | | 5.75 (1.07) | 5.41 (0.79) | 1.213 | 0.27 | 5.72 (0.89) | 5.52 (1.03) | 0.424 | 0.51 | 5.28 (0.99) | 5.77 (0.93) | 2.451 | 0.12 |
|  | Prose memory – immediate recall | | 13.62 (5.09) | 15.35 (4.04) | 1.348 | 0.25 | 15.55 (5.09) | 13.39 (4.27) | 2.191 | 0.14 | 11.86 (3.11) | 15.63 (4.93) | 6.751 | **0.01** |
|  | Prose memory – delayed recall | | 17.20 (4.68) | 19.76 (5.53) | 2.549 | 0.11 | 19.72 (4.94) | 17.13 (5.11) | 2.666 | 0.11 | 14.57 (4.15) | 20.19 (4.58) | 14.725 | **<0.001** |
|  | Memory with interference – 10 seconds | | 6.83 (2.71) | 7.17 (2.37) | 0.176 | 0.67 | 6.94 (2.43) | 7.00 (2.69) | 0.005 | 0.94 | 5.71 (3.24) | 7.63 (1.86) | 5.807 | **0.02** |
|  | Memory with interference – 30 seconds | | 6.33 (2.40) | 6.94 (2.51) | 0.612 | 0.43 | 6.55 (2.68) | 6.60 (2.29) | 0.005 | 0.94 | 5.21 (2.52) | 7.30 (2.11) | 7.872 | **<0.01** |
| **Comprehension** | Token test | | 4.95 (0.14) | 4.94 (0.16) | 0.127 | 0.72 | 4.94 (0.16) | 4.95 (0.14) | 0.064 | 0.80 | 4.96 (0.13) | 4.94 (0.16) | 0.157 | 0.69 |
| **Executive functions** | TMT Ba | | 160.91 (125.30) | 109.56 (39.30) | 2.49 | 0.12 | 123.76 (68.49) | 152.27 (121.62) | 0.75 | 0.39 | 162.38 (79.56) | 128.57 (110.92) | 0.95 | 0.33 |
| Cognitive estimations | | 4.79 (0.65) | 4.58 (0.50) | 1.141 | 0.29 | 4.66 (0.48) | 4.73 (0.68) | 0.143 | 0.70 | 4.57 (0.85) | 4.77 (0.42) | 1.086 | 0.30 |
| Abstract reasoning | | 4.79 (1.74) | 5.77 (0.43) | 5.032 | **0.03** | 5.72 (0.46) | 4.78 (1.78) | 4.729 | **0.03** | 4.92 (1.81) | 5.33 (1.20) | 0.728 | 0.39 |
| Phonemic fluency | | 11.20 (3.66) | 11.90 (3.68) | 0.353 | 0.55 | 12.87 (3.90) | 10.42 (3.11) | 4.998 | **0.03** | 9.53 (2.80) | 12.51 (3.65) | 7.139 | **0.01** |
| Clock drawing | | 8.14 (2.39) | 7.11 (2.91) | 1.531 | 0.22 | 7.88 (2.42) | 7.58 (2.84) | 0.129 | 0.72 | 6.71 (3.25) | 8.24 (2.14) | 3.259 | 0.07 |
| **Visuo-spatial abilities** | Overlapping figure test | | 29.16 (7.98) | 31.29 (8.31) | 0.682 | 0.41 | 32.50 (8.26) | 28.13 (7.58) | 3.098 | 0.08 | 27.78 (7.57) | 31.22 (8.23) | 1.691 | 0.20 |
| Copy drawing | | 1.54 (0.50) | 1.76 (0.43) | 2.141 | 0.15 | 1.72 (0.46) | 1.56 (0.50) | 1.048 | 0.31 | 1.36 (0.50) | 1.78 (0.42) | 8.072 | **<0.01** |
| Spontaneous drawing | | 1.70 (0.62) | 1.94 (0.24) | 2.125 | 0.15 | 1.72 (0.66) | 1.86 (0.34) | 0.837 | 0.36 | 1.78 (0.57) | 1.81 (0.48) | 0.029 | 0.86 |
| **Praxis abilities** | Ideative and ideomotor praxis test | | 5.91 (0.28) | 5.94 (0.24) | 0.084 | 0.77 | 5.94 (0.23) | 5.91 (0.28) | 0.140 | 0.71 | 5.85 (0.36) | 5.96 (0.19) | 1.504 | 0.22 |
| **Global score** |  | |  |  |  |  |  |  |  |  |  |  |  |  |

**Note:** *p* value <0.05 are in bold.

**Abbreviations:** M: mean; SD: standard deviation.

**Cognitive functions and the role of clinical and psychological factors**

| **Cognitive domain** | | **Test** | **Abstinence at admission** | | **F** | ***p*** | **Duration of AUD**  **(years)** | | **F** | ***p*** | **Substance use comorbidity** | | **F** | ***p*** |
| --- | --- | --- | --- | --- | --- | --- | --- | --- | --- | --- | --- | --- | --- | --- |
|  |  | | **Yes** | **No** |  |  | **2-9** | **≥ 10** |  |  | **Yes** | **No** |  |  |
|  |  | | **M (SD)** | **M (SD)** |  |  | **M (SD)** | **M (SD)** |  |  | **M (SD)** | **M (SD)** |  |  |
| **Attention** | TMT Aa | | 32.71 (13.48) | 41.55 (18.42) | 1.438 | 0.23 | 38.11 (12.00) | 41.55 (21.50) | 0.369 | 0.54 | 42.50 (21.47) | 39.44 (17.18) | 0.185 | 0.67 |
| **Memory** | Digit span | | 6.14 (0.89) | 5.50 (0.96) | 2.646 | 0.11 | 6.00 (1.08) | 5.30 (0.76) | 5.798 | **0.02** | 5.87 (0.83) | 5.54 (1.00) | 0.736 | 0.39 |
|  | Prose memory – immediate recall | | 18.57(3.78) | 13.47(4.45) | 7.980 | **<0.01** | 14.50 (5.51) | 14.21 (4.11) | 0.035 | 0.85 | 12.50 (4.75) | 14.78 (4.66) | 1.536 | 0.22 |
|  | Prose memory – delayed recall | | 23.14(4.67) | 17.26(4.70) | 9.101 | **<0.01** | 19.11 (5.00) | 17.60 (5.27) | 0.857 | 0.36 | 16.75 (4.80) | 18.63 (5.23) | 0.862 | 0.35 |
|  | Memory with interference – 10 seconds | | 8.00 (1.41) | 6.76 (2.69) | 1.370 | 0.24 | 7.33 (2.56) | 6.69 (2.56) | 0.623 | 0.43 | 6.62 (2.55) | 7.06 (2.58) | 0.183 | 0.67 |
|  | Memory with interference – 30 seconds | | 8.00 (1.52) | 6.29 (2.50) | 2.980 | 0.09 | 6.94 (2.50) | 6.30 (2.40) | 0.690 | 0.41 | 5.87 (2.10) | 6.75 (2.51) | 0.840 | 0.36 |
| **Comprehension** | Token test | | 4.92 (0.18) | 4.95 (0.14) | 0.188 | 0.66 | 4.94 (0.16) | 4.95 (0.14) | 0.064 | 0.80 | 5.00 (0.00) | 4.93 (0.16) | 1.050 | 0.31 |
| **Executive functions** | TMT Ba | | 78.57 (23.81) | 153.25 (107.47) | 3.28 | 0.07 | 128.44 (51.42) | 149.61 (131.18) | 0.41 | 0.52 | 187.62 (184.43) | 127.51 (66.43) | 2.29 | 0.13 |
| Cognitive estimations | | 4.71 (0.48) | 4.70 (0.62) | 0.001 | 0.97 | 4.66 (0.76) | 4.73 (0.44) | 0.143 | 0.70 | 4.37 (1.06) | 4.78 (0.41) | 3.197 | 0.08 |
| Abstract reasoning | | 5.28 (0.48) | 5.17 (1.56) | 0.033 | 0.85 | 5.00 (1.60) | 5.34 (1.30) | 0.587 | 0.44 | 5.00 (1.51) | 5.24 (1.43) | 0.180 | 0.67 |
| Phonemic fluency | | 14.13(3.32) | 10.95(3.51) | 4.829 | **0.03** | 12.00 (3.72) | 11.10 (3.61) | 0.610 | 0.44 | 12.47 (3.80) | 11.25 (3.62) | 0.713 | 0.40 |
| Clock drawing | | 8.28 (2.36) | 7.60 (2.71) | 0.383 | 0.54 | 7.30 (2.62) | 8.04 (2.66) | 0.785 | 0.38 | 8.12 (2.10) | 7.62 (2.77) | 0.230 | 0.63 |
| **Visuo-spatial abilities** | Overlapping figure test | | 35.85(7.62) | 28.85(7.76) | 4.756 | **0.03** | 30.50 (8.46) | 29.69 (7.96) | 0.097 | 0.75 | 29.62 (10.08) | 30.15 (7.71) | 0.027 | 0.87 |
| Copy drawing | | 1.71 (0.48) | 1.61 (0.49) | 0.224 | 0.63 | 1.55 (0.51) | 1.69 (0.47) | 0.830 | 0.36 | 1.25 (0.46) | 1.73 (0.45) | 7.110 | **0.01** |
| Spontaneous drawing | | 1.85 (0.37) | 1.79 (0.53) | 0.086 | 0.77 | 1.83 (0.51) | 1.78 (0.51) | 0.097 | 0.75 | 1.75 (0.46) | 1.81 (0.52) | 0.112 | 0.74 |
| **Praxis abilities** | Ideative and ideomotor praxis test | | 6.00 (0.00) | 5.91 (0.28) | 0.644 | 0.42 | 5.94 (0.23) | 5.91 (0.28) | 0.140 | 0.71 | 5.87 (0.35) | 5.93 (0.24) | 0.378 | 0.54 |
| **Global score** |  | |  |  |  |  |  |  |  |  |  |  |  |  |

| **Cognitive domain** | | **Test** | **Previous substance abuse** | | **F** | ***p*** | **Anxiety** | | **F** | ***p*** |
| --- | --- | --- | --- | --- | --- | --- | --- | --- | --- | --- |
|  |  | | **Yes** | **No** |  |  | **Norm** | **Moderate/**  **high levels** |  |  |
|  |  | | **M (SD)** | **M (SD)** |  |  | **M (SD)** | **M (SD)** |  |  |
| **Attention** | TMT Aa | | 39.14 (20.78) | 40.98 (14.63) | 0.107 | 0.74 | 37.97 (15.75) | 38.42 (19.99) | 0.005 | 0.94 |
| **Memory** | Digit span | | 5.52 (0.87) | 5.70 (1.08) | 0.331 | 0.56 | 5.64 (1.08) | 5.63 (0.95) | 0.001 | 0.97 |
|  | Prose memory – immediate recall | | 13.76 (4.32) | 14.95 (5.13) | 0.645 | 0.42 | 14.71 (5.78) | 14.57 (4.36) | 0.006 | 0.93 |
|  | Prose memory – delayed recall | | 17.28 (3.70) | 19.30 (6.25) | 1.592 | 0.21 | 18.85 (6.23) | 18.31 (5.22) | 0.073 | 0.78 |
|  | Memory with interference – 10 seconds | | 6.66 (2.74) | 7.30 (2.36) | 0.624 | 0.43 | 7.07 (2.97) | 6.68 (2.42) | 0.170 | 0.68 |
|  | Memory with interference – 30 seconds | | 6.00 (2.30) | 7.20 (2.48) | 2.577 | 0.11 | 6.85 (2.76) | 6.05 (2.43) | 0.783 | 0.38 |
| **Comprehension** | Token test | | 4.95 (0.15) | 4.95 (0.15) | 0.003 | 0.96 | 4.96 (0.13) | 5.00 (0.00) | 1.373 | 0.25 |
| **Executive functions** | TMT Ba | | 163.76 (121.18) | 111.94 (65.86) | 2.62 | 0.11 | 188.15 (157.02) | 115.36 (50.71) | 3.58 | 0.07 |
| Cognitive estimations | | 4.71 (0.71) | 4.70 (0.47) | 0.006 | 0.94 | 4.64 (.84) | 4.73 (0.45) | 0.171 | 0.68 |
| Abstract reasoning | | 5.19 (1.56) | 5.20 (1.32) | 0.000 | 0.98 | 4.21 (2.04) | 5.68 (0.58) | 8.930 | **<0.01** |
| Phonemic fluency | | 11.85 (3.77) | 11.12 (3.55) | 0.408 | 0.52 | 11.80 (4.25) | 11.98 (3.48) | 0.019 | 0.89 |
| Clock drawing | | 8.21 (2.22) | 7.20 (2.97) | 1.534 | 0.22 | 7.57 (2.68) | 7.73 (2.80) | 0.029 | 0.86 |
| **Visuo-spatial abilities** | Overlapping figure test | | 30.42 (7.42) | 29.65 (8.91) | 0.093 | 0.76 | 30.14 (8.97) | 30.89 (6.85) | 0.075 | 0.78 |
| Copy drawing | | 1.48 (0.51) | 1.80 (0.41) | 4.964 | **0.03** | 1.71 (0.46) | 1.52 (0.51) | 1.163 | 0.28 |
| Spontaneous drawing | | 1.80 (0.51) | 1.80 (0.52) | 0.003 | 0.95 | 1.78 (0.57) | 1.78 (0.53) | 0.000 | 0.98 |
| **Praxis abilities** | Ideative and ideomotor praxis test | | 5.95 (0.21) | 5.90 (0.30) | 0.398 | 0.53 | 5.92 (0.26) | 5.94 (0.22) | 0.047 | 0.83 |
| **Global score** |  | |  |  |  |  |  |  |  |  |
